# Supplementary material for: A hierarchical approach to removal of unwanted variation for large-scale metabolomics data
Source: PubMed Central journal article supplement (PMC8371158; doi:10.1038/s41467-021-25210-5), 2021-08-17
Supplement: 41467_2021_25210_MOESM2_ESM.pdf [file 41467_2021_25210_MOESM2_ESM.pdf]

## Description of Additional Supplementary Files

**Supplementary Data 1.** A list of all the metabolites measured and their technical details. The summary statistics are measured from log<sub>2</sub> transformed raw data.

**Supplementary Data 2.** The batch sample arrangement design represented as a plate format used in the study to embed intra-batch and inter-batch sample replicates. There are 8 rows and 11 columns per batch, samples marked with "\*" indicates intra-batch sample replicates and "\*\*\*" indicates inter-batch sample replicates.
